# Supplementary material for: Inhaled corticosteroids andStenotrophomonas maltophiliain outpatients with chronic obstructive pulmonary disease: a retrospective cohort study
Source: HighWire-hosted journal article supplement (doi:10.1136/bmjresp-2023-001929), 2024-03-01
Supplement: bmjresp-2023-001929supp001_data_supplement.pdf [file bmjresp-2023-001929supp001_data_supplement.pdf]

**SUPPLEMENTAL APPENDIX 1**

| Comorbidity                 | ICD-10 <sup>†</sup> codes                                                                                                    |
|-----------------------------|------------------------------------------------------------------------------------------------------------------------------|
| Immunodeficiency            | D80-D84, D89                                                                                                                 |
| Stroke                      | I60-I64,<br>G45, G46                                                                                                         |
| Asthma                      | J45                                                                                                                          |
| Atrial fibrillation         | I48                                                                                                                          |
| Depression                  | F32-F34                                                                                                                      |
| Diabetes Mellitus           | E10-E14                                                                                                                      |
| Heart failure               | I11.0, I13.0, I13.2, I42, I50, J81                                                                                           |
| Immunodeficiency            | D80-D84, D89                                                                                                                 |
| Ischaemic heart disease     | I21-I24                                                                                                                      |
| Kidney failure              | E10.2, E11.2, E12.2, E13.2, E14.2,<br>I12.0, I13.1, I13.2,<br>N02-N08, N11, N14, N15.8-N16.5, N16.8, N18, N19, N26,<br>Z99.2 |
| Malignancy                  | C00-C97, except DC44                                                                                                         |
| Peripheral vascular disease | I70.0, I70.2, I70.9, I73.9 I17.0-I17.4, I17.7, I79                                                                           |

<sup>†</sup>International classification of Diseases 10<sup>th</sup> revision used for the definition of comorbidities.
